1 ***Genomic architecture of Shh dependent cochlear morphogenesis***

2

3 Victor Muthu<sup>1</sup>, Alex. M. Rohacek<sup>1</sup>, Yao Yao<sup>2</sup>, Staci M. Rakowiecki<sup>1</sup>, Alexander S.  
4 Brown<sup>1</sup>, Ying-Tao Zhao<sup>1</sup>, James Meyers<sup>1</sup>, Kyoung-Jae Won<sup>3</sup>, Shweta Ramdas<sup>1</sup>,  
5 Christopher D. Brown<sup>1</sup>, Kevin A. Peterson<sup>4</sup>, and Douglas J. Epstein<sup>1,5</sup>.

6

7 <sup>1</sup>Department of Genetics, Perelman School of Medicine, University of Pennsylvania,  
8 Philadelphia, Pennsylvania, USA. <sup>2</sup>Department of Animal and Dairy Science,  
9 Regenerative Bioscience Center, University of Georgia. <sup>3</sup>Biotech Research and  
10 Innovation Centre (BRIC), Novo Nordisk Foundation Center for Stem Cell Biology,  
11 DanStem, Faculty of Health and Medical Sciences, University of Copenhagen,  
12 Copenhagen N, Denmark. <sup>4</sup>The Jackson Laboratory, Bar Harbor, Maine, USA.

13

14

15

16 <sup>5</sup>Corresponding Author: Douglas J. Epstein, Ph.D.  
17 Professor and Vice Chair  
18 Department of Genetics  
19 Perelman School of Medicine  
20 University of Pennsylvania  
21 Clinical Research Bldg., Room 463  
22 415 Curie Blvd  
23 Philadelphia, PA 19104  
24 Phone: (215) 573-4810  
25 Email: epsteind@pennmedicine.upenn.edu  
26

27

28

29 Running title: Regulation of cochlear duct outgrowth

30

31 Key Words: cochlea, organ of Corti, otic vesicle, sensory development, gene regulation,  
32 Shh signaling

33

34 **SUMMARY STATEMENT**

35

36 An integrated genomic approach identifies Shh responsive genes and associated regulatory  
37 sequences with known and previously uncharacterized roles in cochlear morphogenesis,  
38 including genes that prime the cochlea for sensory development.

39 **ABSTRACT**

40

41       The mammalian cochlea develops from a ventral outgrowth of the otic vesicle in  
42 response to Shh signaling. Mouse embryos lacking Shh or its essential signal  
43 transduction components display cochlear agenesis, however, a detailed understanding  
44 of the transcriptional network mediating this process is unclear. Here, we describe an  
45 integrated genomic approach to identify Shh dependent genes and associated  
46 regulatory sequences that promote cochlear duct morphogenesis. A comparative  
47 transcriptome analysis of otic vesicles from mouse mutants exhibiting loss (*Smo<sup>ecKO</sup>*)  
48 and gain (*Shh-P1*) of Shh signaling revealed a set of Shh responsive genes partitioned  
49 into four expression categories in the ventral half of the otic vesicle. This target gene  
50 classification scheme provided novel insights into several unanticipated roles for Shh,  
51 including priming the cochlear epithelium for subsequent sensory development. We also  
52 mapped regions of open chromatin in the inner ear by ATAC-seq that, in combination  
53 with Gli2 ChIP-seq, identified inner ear enhancers in the vicinity of Shh responsive  
54 genes. These datasets are useful entry points for deciphering Shh dependent regulatory  
55 mechanisms involved in cochlear duct morphogenesis and establishment of its  
56 constituent cell types.

## 57 INTRODUCTION

58

59 The mammalian cochlea derives from a ventral extension of the otic vesicle.  
60 Over the course of several days during embryonic development, this outgrowth  
61 undergoes a complex sequence of morphogenetic changes resulting in cochlear  
62 lengthening, coiling and differential patterning into sensory and nonsensory cell types  
63 that are essential for hearing (Wu and Kelley 2012; Basch et al., 2016; Montcouquiol  
64 and Kelley, 2019). Congenital malformations of the cochlea or defects in many of its  
65 constituent cell types are primary causes of hearing loss, emphasizing the importance  
66 of a thorough understanding of cochlear development (Jackler et al., 1987; Dror and  
67 Avraham, 2010; Schwander et al., 2010; Korver et al., 2017).

68 The organ of Corti is a specialized sensory structure for hearing in mammals that  
69 lines the length of the cochlear duct. It comprises a single row of inner hair cells (IHCs),  
70 three rows of outer hair cells (OHCs) and a variety of interspersed support cells that sit  
71 atop the basilar membrane. Sound waves are propagated through the cochlear duct by  
72 way of fluid motions that cause the basilar membrane to resonate at frequency  
73 dependent positions. OHCs enhance hearing sensitivity and frequency selectivity by  
74 amplifying basilar membrane vibrations in a feedback loop driven by OHC electromotility  
75 (Fettiplace 2017). Excitation of IHCs convert sound induced vibrations into  
76 electrochemical signals that are transmitted to the brain along auditory nerve fibers  
77 (Kazmierczak and Muller, 2012; Yu and Goodrich, 2014). Even slight deviations in the  
78 precise arrangement of sensory and non-sensory cell types in the organ of Corti can  
79 alter auditory perception (Montcouquiol and Kelley, 2019).

80 We previously described a critical function of the Sonic hedgehog (Shh) signaling  
81 pathway in promoting ventral identity within the otic vesicle that is necessary for the  
82 initiation of cochlear duct outgrowth (Riccomagno et al., 2002; Bok et al., 2007; Brown  
83 and Epstein, 2011). Mouse embryos lacking *Shh*, or carrying an ear conditional  
84 knockout of *Smoothed* (*Foxg1cre; Smo<sup>loxP/-</sup>*, herein termed *Smo<sup>cko</sup>*), an essential Shh  
85 signal transduction component, exhibit cochlear agenesis. We also classified several  
86 transcription factors (*Pax2*, *Otx2*, *Gata3*) with key roles in cochlear development as  
87 transcriptional targets of Shh signaling within the ventral otic epithelium (Brown and

88 Epstein, 2011). Despite these advances, a detailed understanding of the mechanism by  
89 which Shh dependent transcription factors promote cochlear duct outgrowth remains  
90 unclear, in part, because the genes acting downstream in this transcriptional cascade  
91 have yet to be fully elucidated.

92 Shh regulates the expression of target genes through the Gli family of zinc finger  
93 containing transcription factors (Falkenstein and Vokes, 2014). In response to Shh  
94 signaling, transcription can be activated by the binding of full-length Gli proteins (Gli1,  
95 Gli2, Gli3) to cognate recognition sequences in the enhancers and promoters of target  
96 genes, often in conjunction with cooperating factors, or alternatively, by preventing the  
97 accumulation of a truncated Gli3 repressor (Bai et al., 2004; Peterson et al., 2012;  
98 Oosterveen et al., 2012; Oosterveen et al., 2013; Falkenstein and Vokes, 2014).  
99 Cochlear duct outgrowth is severely impaired in *Gli2<sup>-/-</sup>;Gli3<sup>-/-</sup>* embryos and is not  
100 effectively restored in *Shh<sup>-/-</sup>;Gli3<sup>-/-</sup>* double mutants (Bok et al., 2007). These genetic data  
101 suggest that Gli2 and Gli3 function primarily as transcriptional activators to promote the  
102 extension of the cochlear duct (Bok et al., 2007). However, as with the other Shh  
103 dependent transcription factors mentioned above, the inner ear specific targets of Gli2  
104 and Gli3 remain unknown.

105 To identify novel targets of Shh signaling in the inner ear we performed RNA-seq  
106 on otic vesicles isolated from mouse mutants displaying a loss (*Smo<sup>ecKO</sup>*) or gain (Shh-  
107 P1) in Shh signaling at E11.5, when cochlear outgrowth is first evident. We uncovered  
108 an intriguing set of Shh responsive genes with known and previously uncharacterized  
109 roles in cochlear morphogenesis. We also mapped regions of open chromatin in the  
110 inner ear by ATAC-seq (assay for transposase-accessible chromatin using sequencing)  
111 that, in combination with Gli2 ChIP-seq, identified inner ear enhancers in the vicinity of  
112 Shh responsive genes, several of which were functionally validated *in vivo* using a  
113 mouse transgenic reporter assay. This integrated genomic approach revealed several  
114 unexpected roles for Shh signaling, including transcriptional regulation of a set of genes  
115 that prime the medial wall of the cochlear duct for subsequent sensory development.

## 116 RESULTS

117

### 118 Screening for Shh responsive genes expressed during cochlear duct outgrowth

119 To identify a comprehensive set of genes regulated by Shh signaling at early  
120 stages of cochlear duct outgrowth we performed RNA-seq on otic vesicles isolated at  
121 E11.5 from two different mouse mutants and corresponding control littermates that were  
122 previously shown to exhibit loss (*Smo<sup>cko</sup>*) and gain (*Shh-P1*) of Shh signaling in the otic  
123 epithelium (Riccomagno et al., 2002; Brown and Epstein, 2011). *Shh-P1* embryos  
124 display ectopic expression of *Shh* in the dorsal otic vesicle from a P1 transgene  
125 (Riccomagno et al., 2002). A total of 1,122 genes (581 downregulated, 541 upregulated)  
126 were differentially expressed between *Smo<sup>cko</sup>* and control otic vesicles (FDR≤0.05 and  
127 RPKM≥1.0), and 1,573 genes (670 downregulated, 903 upregulated) were differentially  
128 expressed between *Shh-P1* and control embryos (Fig. 1 A,B, Tables S1, S2). We  
129 intersected these datasets to uncover genes that were both downregulated in *Smo<sup>cko</sup>*  
130 and upregulated in *Shh-P1* (Shh activated genes), or upregulated in *Smo<sup>cko</sup>* and  
131 downregulated in *Shh-P1* (Shh repressed genes). This comparative transcriptome  
132 analysis revealed that Shh signaling is necessary and sufficient for the activation of 141  
133 genes and repression of 77 genes in the otic vesicle at E11.5 (Fig. 1C-F, Fig. S1,  
134 Tables S3, S4).

135 Shh activated genes are significantly enriched in gene ontology (GO) terms  
136 associated with inner ear morphogenesis, sensory perception of sound, cochlear  
137 development and Hedgehog signaling activity (Fig. 1G). Of the top 50 Shh activated  
138 genes, 20 have documented inner ear expression in peer reviewed publications,  
139 including seven with established roles in cochlear development and/or auditory function  
140 (Fig. 1D). Genes in this category are likely to serve as Shh dependent regulators of  
141 cochlear development.

142 Shh repressed genes are also enriched for GO terms associated with inner ear  
143 morphogenesis (Fig. S1 and Table S4). Several of these genes (*Hmx2*, *Hmx3*, *Bmp4*,  
144 *Msx1*, *Msx2*, *Meis1*, *Meis2*) are expressed in dorsal regions of the otic vesicle, and/or  
145 have known roles in vestibular development (Wang et al., 2004; Chang et al., 2008;  
146 Sánchez-Guardado et al., 2011). These results suggest that Shh signaling within the

147 otic epithelium may be required to prevent a subset of dorsal otic genes from being  
148 ectopically expressed in ventral regions of the otic vesicle.

149 Not all previously described Shh responsive genes in the inner ear were  
150 differentially expressed in both *Smo<sup>ECKO</sup>* and *Shh-P1* embryos. For instance, expression  
151 of the homeodomain transcription factor, *Otx2*, was downregulated five-fold in *Smo<sup>ECKO</sup>*  
152 mutants, but was unaltered in *Shh-P1* embryos (Tables S1, S2). On the other hand,  
153 some genes (e.g. *Six1*, *Eya1* and *Jag1*) that showed no change in mRNA transcript  
154 abundance between *Smo<sup>ECKO</sup>* and control littermates were significantly upregulated in  
155 *Shh-P1* embryos (Tables S1, S2). Hence, we considered any genes exhibiting loss  
156 and/or gain of expression in either *Smo<sup>ECKO</sup>* or *Shh-P1* embryos as candidate *Shh*  
157 responsive genes in the otic vesicle.

158 To validate the expression of candidate Shh responsive genes in the developing  
159 cochlear duct we selected 24 genes that were downregulated in *Smo<sup>ECKO</sup>* and/or  
160 upregulated in *Shh-P1* embryos for further analysis by in situ hybridization. Many of  
161 these genes (n=17) have known or predicted roles in cochlear development, including  
162 seven (*Emx2*, *Eya1*, *Eya4*, *Mpzl2*, *Pls1*, *Six1*, *Gata3*) that when mutated cause hearing  
163 loss in humans and/or mice (<https://hereditaryhearingloss.org/recessive-genes>;  
164 <http://www.informatics.jax.org>). The expression of seven additional genes (*Dsp*,  
165 *Pcdh11x*, *Brip1*, *Gas2*, *Fam107a*, *Slc39a8*, *Capn6*) had not previously been described  
166 in the otic vesicle.

167 Four genes (*Gli1*, *Pax2*, *Gata3* and *Otx2*), already characterized as Shh  
168 dependent transcription factors (Brown and Epstein, 2011), exhibit distinct patterns of  
169 expression in the otic vesicle at E11.5 that include broad ventral (*Gli1*), medial wall  
170 (*Pax2*), ventral tip (*Gata3*), and lateral wall (*Otx2*) domains (Fig. 2). Remarkably, all  
171 other genes selected for follow up analysis were expressed in one of these four Shh  
172 responsive regions. For instance, known (*Emx2*, *Eya1* and *Eya4*) and previously  
173 uncharacterized (*Dsp*, *Mpzl2* and *Pcdh11x*) genes were broadly expressed in the  
174 ventral half of the otic vesicle in a similar pattern with *Gli1* (Fig. 2). Six genes (*Brip1*,  
175 *Car13*, *Gas2*, *Fam107a*, *Pls1* and *Six1*) displayed overlapping expression with *Pax2* on  
176 the medial side of the otic vesicle (Fig. 2). Six other genes (*Ano1*, *Fst*, *Hey1*, *Jag1*,  
177 *Lin28b* and *Slc39a8*) were expressed in the ventral tip of the otic vesicle in a similar

178 pattern to *Gata3*, including genes (*Hey1*, *Jag1*, *Lin28b*) implicated in prosensory  
179 development (Benito-Gonzalez and Doetzlhofer, 2014; Kiernan and Gridley, 2006;  
180 Golden et al., 2015). Finally, two genes (*Capn6*, *Rspo2*) were expressed on the lateral  
181 wall of the otic vesicle, comparable to *Otx2*. These results demonstrate the utility of our  
182 differential RNA-seq analysis for discovery of Shh responsive genes expressed in  
183 discrete ventral territories of the otic vesicle during the initial stages of cochlear duct  
184 outgrowth.

185         Given that the otic vesicle fails to extend ventrally in *Smo<sup>cko</sup>* embryos at E11.5,  
186 the reduced expression of Shh responsive genes may be due to the loss of Shh  
187 signaling activity, or to the loss of ventral otic tissue. To discern between these two  
188 possibilities, we evaluated expression one day earlier, at E10.5, prior to the emergence  
189 of differences in otic vesicle morphology between *Smo<sup>cko</sup>* and control embryos (Fig. 3).  
190 Our earlier work revealed that expression of *Gli1*, *Pax2*, *Gata3*, and *Otx2* was absent  
191 from *Smo<sup>cko</sup>* otic vesicles at E10.5 (Brown and Epstein, 2011). Similarly, the majority of  
192 Shh responsive genes analyzed here showed abrogated otic expression in *Smo<sup>cko</sup>*  
193 mutants compared to control littermates at E10.5 (Fig. 3). It should be noted that  
194 compared to E11.5, the expression of several of these genes was weaker (*Dsp*, *Emx2*,  
195 *Mpzl2*, *Car13*, *Pls1*, *Hey1*) or not detected (*Fst*, *Pcdh11x*) in control embryos at E10.5.

196         The expression of *Six1* and *Jag1*, with defined roles in prosensory development,  
197 displayed more complex alterations in *Smo<sup>cko</sup>* mutants. These genes are prominently  
198 expressed on the ventromedial side of the otic vesicle in control embryos (Fig. 3),  
199 encompassing prospective sensory progenitors that begin to differentiate after E12.5  
200 (Ruben, 1967; Chen and Segil, 1999). Interestingly, the expression of *Six1* and *Jag1* is  
201 flipped in *Smo<sup>cko</sup>* mutants, with loss of medial and gain of lateral otic staining (Fig.3).  
202 Two other genes (*Eya1* and *Eya4*) with broad ventral expression in the otic vesicle at  
203 E11.5 showed loss of medial and maintenance of lateral otic expression in *Smo<sup>cko</sup>*  
204 mutants (Fig. 3). Since *Eya1* and *Six1* form a transcriptional complex with *Sox2* to  
205 regulate hair cell development (Ahmed et al., 2012), we evaluated *Sox2* expression in  
206 *Smo<sup>cko</sup>* mutants, which also exhibited a medial to lateral switch in otic vesicle  
207 expression (Fig. S2). Not all genes expressed along the ventromedial wall showed  
208 flipped expression in *Smo<sup>cko</sup>* mutants, suggesting that this phenomenon may be



209 specific for genes with prosensory function. Since *Otx2* is required to repress sensory  
210 development on the lateral (nonsensory) side of the cochlear duct (Vendrell et al.,  
211 2015), we posit that the downregulation of *Otx2* in *Smo<sup>ecKO</sup>* embryos accounts for the  
212 derepression of genes with prosensory function on the lateral wall of the otic vesicle.

213 We also addressed the sufficiency of Shh to activate candidate target genes in  
214 the otic vesicle by evaluating their expression in *Shh-P1* embryos. The majority of  
215 genes (21/24) were ectopically expressed in broad dorsal (*Emx2*, *Eya1*, *Eya4*, *Mpzl2*,  
216 *Pcdh11x*, *Pax2*, *Pls1*) or lateral (*Dsp*, *Brip1*, *Car13*, *Gas2*, *Fam107a*, *Six1*, *Gata3*, *Ano1*,  
217 *Fst*, *Hey1*, *Jag1*, *Lin28b*, *Slc39a8*) regions of the otic vesicle in *Shh-P1* embryos at  
218 E11.5 (Fig. 4). Three genes (*Otx2*, *Capn6*, *Rspo2*) expressed in a ventrolateral otic  
219 domain did not show ectopic expression in *Shh-P1* embryos, suggesting that additional  
220 factors are required for their activation in conjunction with Shh. Taken together, these  
221 data identify a set of Shh responsive genes with known and potentially novel roles in  
222 early aspects of cochlear development.

223

#### 224 **ATAC-seq identifies active regulatory sequences in the otic vesicle**

225 The expression of Shh responsive genes in the inner ear may be directly  
226 regulated by Gli2 and Gli3 (Bok et al., 2007), indirectly regulated by other Shh  
227 dependent transcription factors (e.g. *Pax2*, *Gata3*, *Otx2*), or by a combination of Shh  
228 dependent and independent transcription factors, as described in the spinal cord  
229 (Peterson et al., 2012; Oosterveen et al., 2012). As an entry point to deciphering the  
230 transcriptional mechanisms regulating Shh target gene expression in the inner ear, we  
231 performed ATAC-seq on chromatin isolated from wild type otic vesicles at E11.5. ATAC-  
232 seq profiles from four highly correlated biological replicates (peaks present in at least  
233 two samples) were merged, yielding 30,720 regions of open chromatin accessibility that  
234 map to intergenic (22.7%), intronic (24.3%), exonic (5.3%) and promoter (47.6%)  
235 regions of the genome (Fig. 5A).

236 Gene regulatory sequences typically reside within regions of open chromatin  
237 (Buenrostro et al., 2013; Vierstra and Stamatoyannopoulos, 2016). In agreement with  
238 this observation, promoters of actively transcribed genes in the inner ear (RNA-seq,  
239 RPKM $\geq$ 1) were more likely to display ATAC-seq signal compared to promoters of

240 inactive genes (RNAseq, RPKM<1) (Fig. 5B). ATAC-seq peaks were also selectively  
241 enriched on functionally validated mouse inner ear enhancers (80%) from the VISTA  
242 Enhancer Database (Visel et al 2007), compared to hindbrain (22%) and limb (21%)  
243 enhancers (Fig. 5C,D,F). Similar ATAC-seq signal enrichment was observed for  
244 orthologous mouse sequence of human inner ear enhancers (32%) compared to  
245 hindbrain (10%) and limb (8.5%) enhancers, although levels are overall lower than for  
246 mouse enhancers (Fig. 5C,E,G).

247 Non-coding ATAC-seq peaks were also enriched in the vicinity of genes  
248 annotated for terms associated with inner ear gene expression and mouse phenotypes  
249 according to the GREAT analysis tool (Fig. S3; Mclean et al., 2010). Moreover, non-  
250 coding ATAC-seq peaks from the inner ear were specifically more conserved within  
251 placental mammals, as opposed to across more distantly related vertebrates, compared  
252 to other tissues, suggesting that evolutionary changes in gene regulatory sequences  
253 may underlie mammalian specific adaptations in inner ear morphology (Fig. 5H). Taken  
254 together, these findings suggest that the inner ear ATAC-seq dataset represents a  
255 robust resource for identifying functional regulatory sequences controlling gene  
256 expression in the developing otic vesicle.

257

### 258 **Discovery of Shh dependent inner ear enhancers through genomic integration**

259 To identify Shh dependent regulatory sequences in the inner ear, we overlaid  
260 ATAC-seq and Gli2 ChIP-seq datasets (Fig. 6A). Unfortunately, it was not feasible to  
261 perform Gli2 ChIP-seq on isolated otic vesicles due to technical limitations with small  
262 scale tissue samples. Nevertheless, we took advantage of a Gli2 ChIP-seq dataset  
263 using embryonic mouse heads at E10.5, which included the otic vesicles (see methods).  
264 We found that 4% (605/14457) of intergenic and intronic ATAC-seq peaks overlapped  
265 with Gli2 occupied sites (Fig. 6B). Notably, gene set enrichment analysis demonstrated  
266 that Shh activated genes are significantly enriched around regions of open chromatin  
267 co-bound by Gli2 (FDR≤0.05), consistent with the premise that expression of these  
268 genes is directly regulated by Shh/Gli2 (Fig. 6C). Approximately, 20% (137/605) of  
269 overlapping ATAC-seq/Gli2 ChIP-seq sites also intersected with H3K27ac ChIP-seq  
270 peaks from E11.5 hindbrain (ENCODE project, ENCSR129LAP), a histone modification

271 commonly associated with active enhancers (Fig. 6B). However, Shh activated genes  
272 were not enriched around overlapping genomic sites for these three signals, suggesting  
273 that the H3K27ac ChIP-seq dataset from hindbrain may not be a good predictor of  
274 Shh/Gli2 dependent enhancers in the inner ear (Fig. S4).

275 We next analyzed the DNA sequence at overlapping ATAC-seq/Gli2 ChIP-seq  
276 genomic regions for enrichment of motifs matching transcription factor binding sites  
277 (TFBS). As expected, the most over-represented motif matched the consensus binding  
278 sequence for Gli proteins (Fig. 6D). Other significantly enriched motifs included binding  
279 sites for CTCF, Sox2, Six and Tead family members. The presence of Sox2 and Six  
280 binding sites is particularly intriguing given that the activity of enhancers controlling  
281 expression of Shh/Gli target genes in the neural tube is often dependent on Sox2  
282 (Peterson et al., 2012; Oosterveen et al., 2012), and both Sox2 and Six1 are essential  
283 for inner ear development (Zheng et al., 2003; Ozaki et al., 2004; Kiernan et al., 2005;  
284 Stevens et al., 2019).

285 *Six1*<sup>-/-</sup> and *Smo*<sup>cko</sup> embryos display similar defects in cochlear duct outgrowth  
286 and misexpress several of the same genes in the otic vesicle (Ozaki et al., 2004; Brown  
287 and Epstein, 2011). Some of the phenotypic overlap between *Six1*<sup>-/-</sup> and *Smo*<sup>cko</sup> may  
288 be attributed to altered *Six1* expression in *Smo*<sup>cko</sup> embryos (Fig. 3). A reciprocal  
289 downregulation in Shh signaling was not observed in *Six1*<sup>-/-</sup> mutant ears (Ozaki et al.,  
290 2004). It is also feasible that Gli2 and Six1 converge on common enhancers to co-  
291 regulate target gene expression. To address this possibility, we performed ChIP-qPCR  
292 on chromatin isolated from otic vesicles at E11.5 using antibodies against Gli2 and Six1.  
293 Putative inner ear enhancers (IEEs) with Gli and Six binding sites in the vicinity of Shh  
294 responsive genes (*Frem1*, *Ecel1*, *Fam107a*, *Hey1*, *Cldn22*) demonstrated significant co-  
295 occupancy of Gli2 and Six1, with the exception of *Ecel1*, which did not show Gli2  
296 enrichment (Fig. 6E,F). These results suggest that a subset of Shh responsive genes in  
297 the inner ear may be co-regulated by Gli2 and Six1.

298

### 299 ***In vivo* validation of candidate inner ear enhancers**

300 Three candidate IEEs were selected for functional validation in a transgenic  
301 mouse reporter assay based on the presence of an ATAC-seq signal, conservation of at

302 least one Gli binding site, and proximity to a Shh responsive gene (Fig. 7A,C,E).  
303 Candidate IEEs located in introns of *Jag1*, *Pls1* and *Brip1* demonstrated significant Gli2  
304 enrichment, as assessed by ChIP-qPCR using chromatin isolated from otic vesicles at  
305 E11.5 (Fig. 7G). Results for Gli2 and H3K27ac occupancy at IEEs were more variable in  
306 ChIP-seq datasets from whole brain and hindbrain, respectively, possibly due to under-  
307 representation of inner ear tissue in these samples (Fig. 7A,C,E). Remarkably, each of  
308 the three IEEs generated reproducible patterns of X-gal staining in the otic vesicle of  
309 transgenic embryos, recapitulating aspects of endogenous gene expression (Fig.  
310 7B,D,F and Table 1). ATAC-seq peaks in the vicinity of two other Shh responsive genes  
311 (*Gas2* and *Fam107a*) that did not contain Gli binding sites failed to activate reporter  
312 expression in transgenic embryos (Table 1). These results suggest that chromatin  
313 accessibility on its own may not be sufficient to accurately predict genomic regions with  
314 tissue specific enhancer activity in the inner ear. In sum, our integrated genomic  
315 approach successfully identified Shh dependent genes and enhancers in the inner ear  
316 that should assist future studies designed to address the functional impact of these  
317 factors on cochlear duct outgrowth.

## 318 DISCUSSION

319

### 320 Classification of Shh responsive genes during inner ear development

321 We exploited *Smo<sup>cko</sup>* and *Shh-P1* mutant embryos to identify a comprehensive  
322 set of differentially expressed genes in the inner ear that are transcriptionally activated  
323 and repressed by Shh signaling during the initial stages of cochlear duct outgrowth at  
324 E11.5. Many of these differentially expressed genes have well defined roles in cochlear  
325 development and/or auditory function but were not previously known to be dependent  
326 on Shh for their expression. Our analysis also uncovered genes with previously  
327 uncharacterized inner ear expression that represent strong candidates for follow up  
328 studies to investigate their roles in cochlear morphogenesis.

329 A novel outcome of this work is the observation that Shh responsive genes are  
330 partitioned into four expression domains in the ventral half of the otic vesicle. This  
331 finding reveals several new insights into the role of Shh in assigning regional and  
332 cellular identities to otic epithelial progenitors. Firstly, the 'broad ventral' class of Shh  
333 responsive genes distinguishes auditory (ventral) from vestibular (dorsal) regions of the  
334 otic vesicle (Fig. 2). Secondly, the downregulation of genes (e.g. *Eya1*, *Six1*, *Jag1* and  
335 *Sox2*) with essential roles in prosensory development in 'broad ventral', 'medial wall'  
336 and 'ventral tip' regions of the otic vesicle in *Smo<sup>cko</sup>* embryos highlights a previously  
337 unappreciated role for *Shh* in regulating transcription of genes that prime the medial wall  
338 of the cochlear duct for subsequent sensory development. Thirdly, loss of *Otx2*  
339 expression on the ventrolateral side of *Smo<sup>cko</sup>* otic vesicles likely explains the ectopic  
340 expression of prosensory markers, indicating an additional role for Shh in ensuring  
341 correct positioning of the prosensory domain. Since conditional *Otx2* mutants also show  
342 ectopic expression of prosensory markers in non-sensory regions of the cochlear duct  
343 (Vendrell et al., 2015), and that *Mycn* and *Six1* mutants display similar phenotypes,  
344 including the downregulation of *Otx2* expression (Ozaki et al., 2004; Vendrell et al.,  
345 2015), we propose that Shh/Gli, *Mycn* and *Six1* cooperate to regulate *Otx2* expression  
346 on the ventrolateral side of the otic vesicle.

347 Prior studies demonstrated requirements for Shh in limiting the size of the  
348 prosensory domain and preventing precocious cell cycle exit and/or differentiation of

349 sensory progenitors (Driver et al., 2008; Bok et al., 2013). These functions contrast with  
350 those described in our study in that they are mediated by a different source of Shh  
351 (spiral ganglia versus notochord) acting at a later stage of development (E13.5 versus  
352 E10.5). Thus, Shh signaling fulfills spatially and temporally distinct roles in regulating  
353 positive and negative aspects of sensory epithelia formation in the cochlear duct.

354

### 355 **Characterization of inner ear enhancers regulating Shh responsive genes**

356 The overlap in expression of Shh responsive genes with transcription factors  
357 (*Gli1*, *Pax2*, *Gata3*, *Otx2*) in each of the four Shh responsive regions of the otic vesicle  
358 suggested a possible mode of regulation. In partial support of this claim, we observed  
359 an enrichment of Shh responsive genes in the vicinity of putative IEEs identified by sites  
360 of chromatin accessibility and Gli2 occupancy. Gli motifs were the most abundant TFBS  
361 in these putative IEEs, whereas, binding sites for other Shh dependent transcription  
362 factors (*Pax2*, *Gata3*, *Otx2*) were not enriched in this dataset. These results suggest  
363 that *Pax2*, *Gata3* and *Otx2* may not play a significant role in the direct regulation of Shh  
364 responsive genes at E11.5, but leaves open the possibility that they may do so at earlier  
365 stages of inner ear development.

366 Despite the absence of predicted TFBS from putative Shh dependent IEEs, our  
367 analysis identified other transcription factors, including *Six1* and *Sox2*, that may  
368 cooperate with Gli2 in the direct regulation of Shh responsive genes in the otic vesicle at  
369 E11.5. *Six1* is a particularly compelling candidate given the phenotypic similarities  
370 between *Six1*<sup>-/-</sup> and *Smo*<sup>ecto</sup> mutants, including cochlear agenesis and altered  
371 dorsoventral patterning of the otic vesicle, suggesting that Gli2 and *Six1* may regulate  
372 common target genes (Zheng et al., 2003; Ozaki et al., 2004; Brown and Epstein,  
373 2011). The co-recruitment of Gli2 and *Six1* to a subset of putative IEEs in the vicinity of  
374 Shh responsive genes is consistent with this premise.

375 We also demonstrated that sites of open chromatin overlapping with conserved  
376 Gli binding sites in the vicinity of Shh responsive genes are good predictors of functional  
377 IEEs. Interestingly, IEEs with optimal (*Jag1*) and low to moderate (*Pls1*, *Brip1*) affinity  
378 Gli motifs each directed patterns of reporter activity in the ventral otocyst that resembled  
379 expression of the nearby gene. Thus, unlike Hh/Gli signaling in other developmental

380 contexts, Gli binding site quality does not appear to correlate with enhancer activity in  
381 Shh responsive cells in the inner ear (Peterson et al., 2012; White et al., 2012; Ramos  
382 and Barolo 2013; Lorberbaum et al., 2016).

383         The three genes (*Jag1*, *Pls1* and *Brip1*) for which IEEs were identified were not  
384 previously known to be regulated by Shh signaling. Gain and loss of function studies  
385 indicate that *Jag1*, a Notch ligand, is required for prosensory development (Kiernan et  
386 al., 2001; Kiernan et al., 2005; Kiernan et al., 2006; Brooker et al., 2006). The initiation  
387 of *Jag1* expression in the otic placode is regulated by Wnt signaling (Jayasena et al.,  
388 2008), whereas our data suggests that maintenance of *Jag1* in prosensory progenitors  
389 is dependent on Shh. *Pls1* is an actin bundling protein that maintains the length and  
390 width of stereocilia in inner hair cells and is required for optimal hearing in adult mice  
391 (Taylor et al., 2015). Since *Pls1* is dispensable for the initial formation of stereocilia, it  
392 remains to be determined what role its Shh regulated expression might play during otic  
393 development. Similarly, the inner ear function of *Brip1*, a member of the RecQ DEAH  
394 helicase family that interacts with *Brca1* in DNA damage repair and tumor suppression,  
395 is currently unknown (Ouhtit et al., 2016).

396         In summary, our integrated genomic approach greatly expands the list of genes  
397 and regulatory sequences that depend on Shh signaling in the inner ear. These  
398 datasets should benefit future studies addressing the function and regulation of key  
399 genes acting downstream of Shh that promote cochlear duct morphogenesis and  
400 establish its distinct cellular composition.

## 401 MATERIALS AND METHODS

402

### 403 **Mouse Lines**

404 All mouse experiments were performed in accordance with the ethical guidelines of the  
405 National Institutes of Health and with the approval of the Institutional Animal Care and  
406 Use Committee of the University of Pennsylvania. The production of *Smo<sup>cko</sup>* (*Foxg1cre*;  
407 *Smo<sup>loxp/-</sup>*) and control (*Foxg1cre*; *Smo<sup>loxp/+</sup>*) embryos was described previously (Brown  
408 and Epstein, 2011). The *Shh-P1* mouse line was described previously (Riccomagno et  
409 al., 2002).

410

### 411 **RNA-seq analysis**

412 Otic vesicles from control, *Smo<sup>cko</sup>* and *Shh-P1* embryos (n=4 pairs of biological  
413 replicates for each genotype) were isolated at E11.5, exposed to collagenase P  
414 (1mg/ml) at 37°C for 20 min to remove surrounding mesenchyme, and submerged in  
415 RNA<sup>later</sup>™ Stabilization Solution (Thermo Fisher Scientific, Cat#AM7022). RNA was  
416 extracted using the RNeasy Micro Kit (Qiagen, Cat#74004). Total RNA (200ng) was  
417 used for poly A selected RNA-seq library preparation using the NEBNext® Ultra™  
418 Directional RNA Library Prep Kit for Illumina® (mRNA) (New England Biolabs  
419 Cat#E7530S). Biological replicates were individually barcoded, pooled, and sequenced  
420 to generate 100bp single-end reads on one lane of a HiSeq4000 instrument at the Next  
421 Generation Sequencing Core (Perelman School of Medicine, University of  
422 Pennsylvania). RNA-seq reads were aligned to the mm9 mouse genome build  
423 (<http://genome.ucsc.edu/>) using RUM (Grant et al. 2011). Differential gene expression  
424 analysis between *Smo<sup>cko</sup>*, *Shh-P1* and control samples was performed using edgeR  
425 (Robinson et al., 2010). Heatmaps for RNA-seq data were generated using PIVOT (Zhu  
426 et al., 2018). RNA-seq data were deposited in NCBI GEO under accession number  
427 GSE131165.

428

### 429 **ATAC-seq analysis**

430 Four independent ATAC-seq libraries were generated from wild type otic vesicles (n=10  
431 per library) isolated at E11.5 using 50,000 cells per replicate as described (Buenrostro



432 et al., 2015). Tagmentation was performed using the Nextera® DNA Library Preparation  
433 Kit (Illumina® 15028211). Multiplexed 50 bp paired-end sequence reads were  
434 generated on a single lane of an Illumina HiSeq2000 instrument. ATAC-seq reads were  
435 mapped to the mm9 mouse genome build (<http://genome.ucsc.edu/>) using Bowtie with  
436 default parameters (Langmead et al., 2009). Regions of open chromatin were identified  
437 by MACS2 using default parameters (Zhang et al., 2008). Only high confidence peaks  
438 that were present in at least two libraries were reported. ATAC-seq data were deposited  
439 in NCBI GEO under accession number GSE131165.

440

#### 441 ***Gli2 ChIP-seq***

442 Mouse embryonic tissues were harvested from timed matings between Swiss Webster  
443 (Taconic) mice where day of detection of vaginal plug was considered embryonic day  
444 E0.5. ChIP was performed on pooled tissue obtained from 40 E10.5 heads isolated  
445 below the otic vesicle and processed for ChIP as described (Peterson et al., 2012).  
446 Briefly, embryonic tissue was fixed for 30 minutes in 1% formaldehyde/PBS at room  
447 temperature followed by quenching with 125 mM glycine. ChIP was performed on the  
448 entire lysate using magnetic Dynabeads™ Protein G (Thermo Fisher Scientific) bound  
449 with goat anti-Gli2 antibody (R&D Cat# AF3635). A ChIP DNA library was prepared for  
450 Illumina Sequencing according to manufacturer recommendations and 50 bp single-end  
451 reads were obtained from a Hi-Seq2000 instrument. The resulting reads were mapped  
452 to mouse genome assembly mm9 (<http://genome.ucsc.edu/>) using Bowtie (Langmead  
453 et al., 2009). Gli2 ChIP-seq data were deposited in NCBI GEO under accession number  
454 GSE131165.

455

#### 456 ***Intersection of ATAC-seq and Gli2 ChIP-seq data***

457 Enriched peaks from the ATAC-seq and Gli2 ChIP-seq were intersected using Bedtools  
458 intersect interval function (Galaxy Version 2.27.1+galaxy1) with the parameter, *-wa*,  
459 *overlap on either strand* and returning full length ATAC-seq peaks that overlap with Gli2  
460 ChIP-seq peaks (Quinlan and Hall, 2010).

461

462

463 ***ATAC-seq enrichment at inner ear promoters and VISTA enhancers***

464 ATAC-seq promoter peaks were first identified by intersecting RefSeq (mm9) genes  
465 extracted from UCSC Genome Browser (Table Browser; parameter: create one Bed  
466 record per upstream by 500 bp) using Bedtools intersect interval function (Galaxy  
467 Version 2.27.1+galaxy1) with the parameter, *-wa, overlap on either strand* and returning  
468 RefSeq peaks. The gene name was then used to compare against E11.5 control RNA-  
469 seq genes that are expressed (RPKM $\geq$ 1.0) or not expressed (RPKM $<$ 1.0) in the otic  
470 vesicle. The enrichment of ATAC-seq peaks against VISTA enhancers  
471 (<https://enhancer.lbl.gov/>) was performed by converting enhancer coordinates to peak  
472 files and then intersected with ATAC-seq non-coding peaks using Bedtools (parameters  
473 similar to above and returning ATAC-seq peaks).

474

475 ***ATAC-seq conservation analysis***

476 We measured placental mammal-derived (PS) and vertebrate-derived (VS) PhyloP  
477 scores within each ATAC-seq peak, and estimated the ratio of these values for each  
478 tissue. For each tissue, we first identified the mode of the enhancer peak width  
479 distribution, so that each called peak could be elongated or trimmed to a standard peak  
480 size. Then, extending peaks shorter than this mode, or contracting peaks longer than  
481 the mode, we estimated PS and VS for each base of each peak. For each tissue, the  
482 mean PS and VS were higher at the center of the peak compared to the edges. Since  
483 the PS and VS have different ranges of values, we used their ratio for comparison  
484 between tissues instead of using their absolute values. For each base position, we then  
485 obtained the ratio of the mean PS score to the mean VS score across all peaks in that  
486 tissue. As a control, we also took the set of all exons in the mouse genome, and  
487 defining a peak of length 201, obtained PS and VS for each base of each exon.

488

489 ***Functional annotation analysis of ATAC-seq data***

490 Functional annotation analysis of ATAC-seq data was performed using GREAT version  
491 3.0.0 (McLean et al., 2010), linking peaks to the nearest transcription start site  
492 (TSS)  $\pm$  100 kb. Functional terms were selected based on reported significance score  
493 and relevance to the biological system.

494 **Gene set enrichment analysis (GSEA)**

495 GSEA was performed using the GSEA software (MSigDB 6.1 and 6.2) as described  
496 (Mootha et al., 2003; Subramanian et al., 2005). Ranked file (rnk) for Shh activated  
497 genes was prepared from the RNA-seq differential expression analyses based on the  
498  $\log_2$  fold change. The .grp files were prepared from expressed genes (i.e. RNA-seq,  
499 RPKM  $\geq 1.0$ ) that are found within the intersected peaks: i) ATAC-seq and Gli2 ChIP-  
500 seq  $\pm 500$  kb (Fig. 6C) and ii) ATAC-seq, Gli2 ChIP-seq and H3K27ac ChIP-seq peaks  
501  $\pm 500$  kb (Fig. S4).

502

503 **ChIP-qPCR**

504 Otic vesicles were dissected in DMEM (with 10% fetal bovine serum) from  
505 approximately 25-30 E11.5 embryos per replicate pool (n=3 replicates), homogenized  
506 into small pieces, and crosslinked with 1% paraformaldehyde for 15 min at room  
507 temperature with shaking. ChIP was performed essentially as described on three  
508 biological replicates (Zhao et al., 2012) using 6  $\mu$ g of anti-Gli2 (R&D Cat# AF3635), anti-  
509 Six1 (Cell Signaling Technology, Cat#12891) or anti-immunoglobulin G (IgG) (Cell  
510 Signaling Technology) antibodies. QPCR was conducted as described (Zhao et al.,  
511 2012) using primer sequences listed in Table S5. Positive control primers in Fig. 7G  
512 amplify a DNA fragment from a *Ptch1* enhancer bound by Gli2.

513

514 **Transgenic mouse reporter assay**

515 Candidate inner ear enhancers were cloned into a vector containing the *Hsp68*  
516 promoter, *lacZ* gene and SV40 poly(A) cassette. Transient transgenic embryos were  
517 generated by pronuclear injection into fertilized mouse eggs derived from the (BL6xSJL)  
518 F1 mouse strain (Jackson Laboratories) at the Transgenic and Chimeric Mouse Facility  
519 (Perelman School of Medicine, University of Pennsylvania). For X-gal staining, embryos  
520 were harvested at E11.5, fixed in 0.2% glutaraldehyde/1% formaldehyde at 4°C for 30  
521 minutes, and stained in a solution containing 1 mg/ml X-gal at 37°C for two hours to  
522 overnight.

523

524

525 ***Statistical analysis***

526 Relevant information for each experiment including n-values, statistical tests and  
527 reported p-values are found in the legend corresponding to each figure. In all cases  
528  $p \leq 0.05$  is considered statistically significant and error bars represent standard error of  
529 the mean.

530

531 ***Data availability***

532 RNA-seq, ATAC-seq and ChIP-seq datasets have been deposited in NCBI under GEO  
533 accession number GSE131165.

534 **Acknowledgements**

535 We thank Dr. Jean Richa and his staff at the Transgenic and Chimeric Mouse Facility  
536 (Perelman School of Medicine, University of Pennsylvania) for their assistance in  
537 transgenic mouse production, as well as Dr. Jonathan Schug and his team at PSOM  
538 NGSC for sequencing services. We also thank members of the Epstein lab for critical  
539 comments on this study.

540

541 **Competing Interests**

542 No competing interests declared.

543

544 **Author contributions**

545 V.M., A.M.R., S.M.R., Y.Y., A.S.B., and K.A.P performed the experiments. Y-T.Z., J.M.,  
546 K-J.W., S.R., C.D.B. and V.M. performed data analysis, V.M., Y.Y. and D.J.E.  
547 conceived the project. V.M. and D.J.E. wrote the manuscript.

548

549 **Funding**

550 This work was supported by a grant from the National Institutes of Health [R01  
551 DC006254] to D.J.E.

## REFERENCES

**Bai, C.B., Stephen, D. and Joyner, A.L.** (2004). All mouse ventral spinal cord patterning by hedgehog is Gli dependent and involves an activator function of Gli3. *Dev Cell*. **6**, 103-15.

**Basch, M.L., Brown, R.M. 2nd, Jen, H.I. and Groves, A.K.** (2016). Where hearing starts: the development of the mammalian cochlea. *J Anat*. **228**, 233-54.

**Benito-Gonzalez, A. and Doetzlhofer, A.** (2014). Hey1 and Hey2 control the spatial and temporal pattern of mammalian auditory hair cell differentiation downstream of Hedgehog signaling. *J Neurosci*. **34**,12865-76.

**Bok, J., Dolson, D. K., Hill, P., Ruther, U., Epstein, D. J. and Wu, D. K.** (2007). Opposing gradients of Gli repressor and activators mediate Shh signaling along the dorsoventral axis of the inner ear. *Development* **134**, 1713-22.

**Bok, J., Zenczak, C., Hwang, C.H. and Wu, D.K.** (2013). Auditory ganglion source of Sonic hedgehog regulates timing of cell cycle exit and differentiation of mammalian cochlear hair cells. *Proc Natl Acad Sci U S A*. **110**, 13869-74.

**Brooker, R., Hozumi, K. and Lewis, J.** (2006). Notch ligands with contrasting functions: Jagged1 and Delta1 in the mouse inner ear. *Development* **133**, 1277-86.

**Brown, A.S. and Epstein, D.J.** (2011). Otic ablation of Smoothed reveals direct and indirect requirements for Hedgehog signaling in inner ear development. *Development* **138**, 3967-3976.

**Buenrostro, J.D., Giresi, P.G., Zaba, L.C., Chang, H.Y. and Greenleaf, W.J.** (2013). Transposition of native chromatin for fast and sensitive epigenomic profiling of open chromatin, DNA-binding proteins and nucleosome position. *Nat Methods*. **10**, 1213-8.

**Chang, W., Lin, Z., Kulesa, H., Hebert, J., Hogan, B.L. and Wu, D.K.** (2008). Bmp4 is essential for the formation of the vestibular apparatus that detects angular head movements. *PLoS Genet*. **4**, e1000050.

**Chen, P. and Segil, N.** (1999). p27(Kip1) links cell proliferation to morphogenesis in the developing organ of Corti. *Development* **126**, 1581-90.

**Driver, E.C., Pryor, S.P., Hill, P., Turner, J., Ruther, U., Biesecker, L.G., Griffith, A.J. and Kelley, M.W.** (2008). Hedgehog signaling regulates sensory cell formation and auditory function in mice and humans. *J Neurosci*. **28**, 7350-8.

**Dror, A.A. and Avraham, K.B.** (2010). Hearing impairment: a panoply of genes and functions. *Neuron* **68**, 293–308.

**Falkenstein, K.N. and Vokes, S.A.** (2014). Transcriptional regulation of graded Hedgehog signaling. *Semin Cell Dev Biol.* **33**, 73-80.

**Fettiplace, R.** (2017). Hair Cell Transduction, Tuning, and Synaptic Transmission in the Mammalian Cochlea. *Compr. Physiol.* **7**, 1197–1227.

**Grant, G.R., Farkas, M.H., Pizarro, A.D., Lahens, N.F., Schug, J., Brunk, B.P., Stoeckert, C.J., Hogenesch, J.B., and Pierce, E.A.** (2011). Comparative analysis of RNA-Seq alignment algorithms and the RNA-Seq unified mapper (RUM). *Bioinformatics* **27**, 2518–2528.

**Golden, E.J., Benito-Gonzalez, A., Doetzlhofer, A.** (2015). The RNA-binding protein LIN28B regulates developmental timing in the mammalian cochlea. *Proc Natl Acad Sci U S A.* **112**, E3864-73.

**Jackler, R.K., Luxford, W.M. and House, W.F.** (1987). Congenital malformations of the inner ear: a classification based on embryogenesis. *Laryngoscope* **97**, 2-14.

**Jayasena, C.S., Ohyama, T., Segil, N. and Groves, A.K.** (2008). Notch signaling augments the canonical Wnt pathway to specify the size of the otic placode. *Development* **135**, 2251-61.

**Kazmierczak, P., and Müller, U.** (2012). Sensing sound: molecules that orchestrate mechanotransduction by hair cells. *Trends Neurosci.* **35**, 220–229.

**Kiernan, A.E., Ahituv, N., Fuchs, H., Balling, R., Avraham, K.B., Steel, K.P., and Hrabé de Angelis, M.** (2001). The Notch ligand Jagged1 is required for inner ear sensory development. *Proc Natl Acad Sci U S A.* **98**, 3873-8.

**Kiernan, A.E., Pelling, A.L., Leung, K.K., Tang, A.S., Bell, D.M., Tease, C., Lovell-Badge, R., Steel, K.P. and Cheah, K.S.** (2005). Sox2 is required for sensory organ development in the mammalian inner ear. *Nature* **434**, 1031-5.

**Kiernan, A.E., Xu, J. and Gridley, T.** (2006). The Notch ligand JAG1 is required for sensory progenitor development in the mammalian inner ear. *PLoS Genet.* **2**, e4.

**Korver, A.M., Smith, R.J., Van Camp, G., Schleiss, M.R., Bitner-Glindzicz, M.A., Lustig, L.R., Usami, S.I. and Boudewyns, A.N.** (2017). Congenital hearing loss. *Nat Rev Dis Primers* **3**, 16094.

**Langmead, B., Trapnell, C., Pop, M. and Salzberg, S.L.** (2009). Ultrafast and memory-efficient alignment of short DNA sequences to the human genome. *Genome Biol.* **10**, R25.

**Lorberbaum, D.S., Ramos, A.I., Peterson, K.A., Carpenter, B.S., Parker, D.S., De, S., Hillers, L.E., Blake, V.M., Nishi, Y., McFarlane, M.R., Chiang, A.C., Kassis, J.A.,**

**Allen, B.L. and McMahon, A.P. and Barolo, S.** (2016). An ancient yet flexible cis-regulatory architecture allows localized Hedgehog tuning by patched/Ptch1. *Elife*. **5**, e13550.

**McLean, C.Y., Bristor, D., Hiller, M., Clarke, S.L., Schaar, B.T., Lowe, C.B., Wenger, A.M. and Bejerano, G.** (2010). GREAT improves functional interpretation of cis-regulatory regions. *Nat Biotechnol*. **28**, 495-501.

**Montcouquiol, M. and Kelley, M.W.** (2019). Development and Patterning of the Cochlea: From Convergent Extension to Planar Polarity. *Cold Spring Harb Perspect Med*. Jan 7. pii: a033266.

**Mootha, V.K., Lindgren, C.M., Eriksson, K.F., Subramanian, A., Sihag, S., et al.** (2003). PGC-1alpha-responsive genes involved in oxidative phosphorylation are coordinately downregulated in human diabetes. *Nat Genet*. **34**, 267-73.

**Oosterveen, T., Kurdija, S., Alekseenko, Z., Uhde, C.W., Bergsland, M., Sandberg, M., Andersson, E., Dias, J.M., Muhr, J. and Ericson, J.** (2012). Mechanistic differences in the transcriptional interpretation of local and long-range Shh morphogen signaling. *Dev Cell*. **23**, 1006-19.

**Oosterveen, T., Kurdija, S., Ensterö, M., Uhde, C.W., Bergsland, M., Sandberg, M., Sandberg, R., Muhr, J. and Ericson, J.** (2013). SoxB1-driven transcriptional network underlies neural-specific interpretation of morphogen signals. *Proc Natl Acad Sci U S A*. **110**, 7330-5.

**Ouhtit, A., Gupta, I. and Shaikh, Z.** (2016). BRIP1, a potential candidate gene in development of non-BRCA1/2 breast cancer. *Front Biosci* **8**, 289-98.

**Ozaki, H., Nakamura, K., Funahashi, J., Ikeda, K., Yamada, G., Tokano, H., Okamura, H.O., Kitamura, K., Muto, S., Kotaki, H., Sudo, K., Horai, R., Iwakura, Y. and Kawakami, K.** (2004). Six1 controls patterning of the mouse otic vesicle. *Development* **131**, 551-62.

**Peterson, K.A., Nishi, Y., Ma, W., Vedenko, A., Shokri, L., Zhang, X., McFarlane, M., Baizabal, J.M., Junker, J.P., van Oudenaarden, A., Mikkelsen, T., Bernstein, B.E., Bailey, T.L., Bulyk, M.L., Wong, W.H. and McMahon, A.P.** (2012). Neural-specific Sox2 input and differential Gli-binding affinity provide context and positional information in Shh-directed neural patterning. *Genes Dev*. **26**, 2802-16.

**Quinlan, A.R. and Hall, I.M.** (2010). BEDTools: a flexible suite of utilities for comparing genomic features. *Bioinformatics*. **26**, 841-2.

**Ramos, A.I. and Barolo, S.** (2013). Low-affinity transcription factor binding sites shape morphogen responses and enhancer evolution. *Philos Trans R Soc Lond B Biol Sci*. **368**, 20130018.



**Riccomagno, M. M., Martinu, L., Mulheisen, M., Wu, D. K. and Epstein, D. J.** (2002). Specification of the mammalian cochlea is dependent on Sonic hedgehog. *Genes Dev* **16**, 2365-78.

**Robinson, M.D., McCarthy, D.J., and Smyth, G.K.** (2010). edgeR: a Bioconductor package for differential expression analysis of digital gene expression data. *Bioinformatics*. **26**, 139–140.

**Ruben, R.J.** (1967). Development of the inner ear of the mouse: a radioautographic study of terminal mitoses. *Acta Otolaryngol.* **220**, 1-44.

**Sánchez-Guardado, L.Ó., Ferran, J.L., Rodríguez-Gallardo, L., Puelles, L., Hidalgo-Sánchez, M.** (2011). Meis gene expression patterns in the developing chicken inner ear. *J Comp Neurol.* **519**, 125-47.

**Schwander, M., Kachar, B., and Müller, U.** (2010). Review series: The cell biology of hearing. *J. Cell Biol.* **190**, 9–20.

**Steevens, A.R., Glatzer, J.C., Kellogg, C.C., Low, W.C., Santi, P.A. and Kiernan, A.E.** (2019). SOX2 is required for inner ear growth and cochlear nonsensory formation prior to sensory development. *Development*. May 31. pii: dev.170522. doi: 10.1242/dev.170522. [Epub ahead of print]

**Subramanian, A., Tamayo, P., Mootha, V.K., Mukherjee, S., Ebert, B.L., Gillette, M.A., Paulovich, A., Pomeroy, S.L., Golub, T.R., Lander, E.S. and Mesirov, J.P.** (2005). Gene set enrichment analysis: a knowledge-based approach for interpreting genome-wide expression profiles. *Proc Natl Acad Sci U S A.* **102**, 15545-50.

**Taylor, R., Bullen, A., Johnson, S.L., Grimm-Günter, E.M., Rivero, F., Marcotti, W., Forge, A. and Daudet, N.** (2015). Absence of plastin 1 causes abnormal maintenance of hair cell stereocilia and a moderate form of hearing loss in mice. *Hum Mol Genet.* **24**, 37-49.

**Vendrell, V., López-Hernández, I., Durán Alonso, M.B., Feijoo-Redondo, A., Abello, G., Gálvez, H., Giráldez, F., Lamonerie, T. and Schimmang, T.** (2015). Otx2 is a target of N-myc and acts as a suppressor of sensory development in the mammalian cochlea. *Development* **142**, 2792-800.

**Vierstra, J. and Stamatoyannopoulos, J.A.** (2016). Genomic footprinting. *Nat Methods.* **13**, 213-21.

**Visel, A., Minovitsky, S., Dubchak, I. and Pennacchio, L.A.** (2007). VISTA Enhancer Browser--a database of tissue-specific human enhancers. *Nucleic Acids Res.* **35**, D88-92.

**Wang, W., Grimmer, J.F., Van De Water, T.R. and Lufkin, T. (2004).** Hmx2 and Hmx3 homeobox genes direct development of the murine inner ear and hypothalamus and can be functionally replaced by *Drosophila* Hmx. *Dev Cell.* **7**, 439-53.

**White, M.A., Parker, D.S., Barolo, S. and Cohen, B.A. (2012).** A model of spatially restricted transcription in opposing gradients of activators and repressors. *Mol Syst Biol.* **8**, 614.

**Wu, D.K. and Kelley, M.W. (2012).** Molecular mechanisms of inner ear development. *Cold Spring Harb Perspect Biol.* **1**, a008409.

**Yu, W.-M., and Goodrich, L.V. (2014).** Morphological and physiological development of auditory synapses. *Hear. Res.* **311**, 3–16.

**Zhang, Y., Liu, T., Meyer, C.A., Eeckhoute, J., Johnson, D.S., Bernstein, B.E., Nusbaum, C., Myers, R.M., Brown, M., Li, W., Liu, X.S. (2008).** Model-based analysis of ChIP-Seq (MACS). *Genome Biol.* **9**, R137.

**Zhao, L., Zevallos, S.E., Rizzoti, K., Jeong, Y., Lovell-Badge, R. and Epstein, D.J. (2012).** Disruption of SoxB1-dependent Sonic hedgehog expression in the hypothalamus causes septo-optic dysplasia. *Dev Cell.* **22**, 585-96.

**Zheng, W., Huang, L., Wei, Z.B., Silvius, D., Tang, B. and Xu, P.X. (2003).** The role of Six1 in mammalian auditory system development. *Development* **130**, 3989-4000.

**Zhu, Q., Fisher, S.A., Dueck, H., Middleton, S., Khaladkar, M. and Kim, J. (2018).** PIVOT: platform for interactive analysis and visualization of transcriptomics data. *BMC Bioinformatics.* **19**, 6.

552 **FIGURE LEGENDS**

553

554 **Figure 1. Differential expression profiling identifies Shh responsive genes in the**  
555 **inner ear.** (A, B) Heat maps of differential RNA-seq profiles ( $\log_2$  fold change) between  
556 (A) control and *Smo<sup>cko</sup>* (n=4), and (B) control (n=3) and *Shh-P1* (n=4) inner ears at  
557 E11.5 (FDR $\leq$ 0.05 and RPKM $\geq$ 1.0). (C) Intersection of differentially expressed genes in  
558 *Smo<sup>cko</sup>* (red) and *Shh-P1* (blue) inner ears identifies Shh activated (top) and Shh  
559 repressed (bottom) gene sets. (D) Top 50 Shh activated genes that show significant  
560 downregulation in *Smo<sup>cko</sup>* (red) and upregulation in *Shh-P1* (blue) inner ears ( $\log_2$  fold  
561 change). (E, F) Normalized RNA-seq read counts in *Smo<sup>cko</sup>* (red) and *Shh-P1* (blue)  
562 mutants of two representative Shh activated genes, *Gli1* and *Fst*. (G) DAVID Gene  
563 Ontology term enrichment (Biological Processes) for gene sets that are downregulated  
564 in *Smo<sup>cko</sup>* (red) and upregulated in *Shh-P1* (blue) mutants.

565

566 **Figure 2. Classification of Shh responsive genes in wild type otic vesicles at**  
567 **E11.5.** Schematic of a transverse section through the inner ear color coded to represent  
568 the four patterns of Shh responsive genes in broad ventral (magenta diagonal lines) ,  
569 medial wall (light blue), ventral tip (dark blue), and lateral wall (green) regions of the otic  
570 vesicle. Expression of Shh responsive genes as determined by in situ hybridization on  
571 wild type sections through the inner ear at E11.5 (n=3 replicates). Scale bar: 100  $\mu$ m.  
572 Abbreviations: nt, neural tube; D, Dorsal; M, Medial.

573

574 **Figure 3. Shh responsive genes are misregulated in *Smo<sup>cko</sup>* embryos at E10.5.** In  
575 situ hybridization of Shh responsive genes on transverse sections through control and  
576 *Smo<sup>cko</sup>* otic vesicles (n $\geq$ 3 for all panels) at E10.5. Expression in control embryos (red  
577 arrowhead) for most genes is downregulated in *Smo<sup>cko</sup>* mutants with the exception of  
578 select genes (*Eya1*, *Eya4*, *Six1*, *Jag1*), which show maintained or ectopic expression on  
579 the lateral side of the otic vesicle. Scale bar: 100  $\mu$ m.

580

581 **Figure 4. Shh responsive genes are ectopically expressed in *Shh-P1* embryos.**  
582 Schematic of a transverse section through the inner ear of a *Shh-P1* embryo (E11.5)

583 showing ectopic *Shh* expression in the dorsal otocyst (red). In situ hybridization of *Shh*  
584 and *Shh* responsive genes on transverse sections through inner ears of *Shh-P1*  
585 embryos at E11.5 ( $n \geq 3$  for all panels). Ectopic expression is indicated (blue arrowhead).  
586 Note that lateral wall genes (*Otx2*, *Capn6* and *Rspo2*) are not influenced by ectopic *Shh*  
587 signaling in *Shh-P1* embryos. Scale bar: 100  $\mu\text{m}$ .

588

589 **Figure 5. ATAC-seq identifies sites of open chromatin at inner ear regulatory**

590 **sequences.** (A) Genomic distribution of ATAC-seq peaks identified in the inner ear at  
591 E11.5 (FDR $<0.01$ ). (B) ATAC-seq signal enrichment on active versus inactive promoters  
592 at E11.5 ( $*p < 0.05$ , Fisher's exact test). (C) ATAC-seq signal enrichment on mouse  
593 (mm) and human (hs) enhancers active in the inner ear, hindbrain and limb from the  
594 VISTA enhancer browser ( $*p < 0.05$ , Fisher's exact test). (D-G) ATAC-seq signal at  
595 representative mouse (D,F) and human (E,G) inner ear enhancers from the VISTA  
596 enhancer browser. X-gal staining is detected in the otic vesicle (red arrow) of embryos  
597 (E11.5) carrying indicated reporter constructs. (H) Comparison of ATAC-seq sequence  
598 conservation (PhyloP score) from inner ear, hindbrain and limb between placental  
599 mammals and vertebrates. Exonic sequence from the inner ear was used as a deep  
600 conservation control ( $***p < 2.2e-16$ , Kolmogorov-Smirnoff test). Error bars represent  
601 standard error of the mean.

602

603 **Figure 6. Identification of *Shh* dependent inner ear enhancers.** (A) Heatmaps

604 represent the overlap of ATAC-seq (E11.5 inner ear), Gli2 ChIP-seq (E10.5 head), and  
605 H3K27ac ChIP-seq (E11.5 hindbrain, ENCODE project, ENCSR129LAP) signals. (B)  
606 Venn diagram represents the intersection of ATAC-seq (intergenic and intronic), Gli2-  
607 ChIP-seq and H3K27ac-ChIP-seq sites. (C) Gene set enrichment analysis showing  
608 significant enrichment of *Shh* activated genes in the vicinity of overlapping ATAC-seq  
609 and Gli2 ChIP-seq peaks (FDR q-value=0.052). (D) HOMER motif enrichment analysis  
610 for intersected ATAC-seq and Gli2 ChIP-seq peaks. (E and F) ChIP-qPCR analyses  
611 showing significant co-recruitment of Gli2 and Six1 at candidate inner ear enhancers in  
612 the vicinity of *Shh* responsive genes ( $*p < 0.05$ , Student's t-test). Error bars represent  
613 standard error of the mean.

614 **Figure 7. *In vivo* validation of inner ear enhancers.** (A,C,E) UCSC genome browser  
615 tracks display regions of open chromatin, Gli2 binding and H3K27ac enrichment in the  
616 vicinity of Shh responsive genes (*Jag1*, *Pls1* and *Brip1*). Boxed regions (red) represent  
617 location of inner ear enhancers. (B,D,F) X-gal staining of transgenic embryos with lacZ  
618 reporter constructs driven by IEEs. The number of embryos showing reporter activity in  
619 the otic vesicle (red circle) over the total number of transgenic embryos is depicted for  
620 each IEE. (B', D', F') Transverse sections through the otic vesicle of representative  
621 transgenic embryos at E11.5 reveals a pattern of X-gal staining that is comparable to  
622 the expression of the nearby gene (B'', D'', F''). (G) ChIP qPCR analysis of Gli2 binding  
623 on IEEs. A *Ptch1* enhancer is included as a positive control (\*p<0.05, Student's t-test).  
624 Error bars represent standard error of the mean.

| ATAC-seq peaks<br>(chromosome coordinates) | Nearest<br>gene | Gli2 ChIP-seq<br>(head) | Presence of<br>Gli motif | Transgenic<br>embryos (n) | Inner ear reporter<br>activity (n) |
|--------------------------------------------|-----------------|-------------------------|--------------------------|---------------------------|------------------------------------|
| Chr2:136,932,702-136,936,730               | Jag1            | Yes                     | Yes                      | 6                         | 4                                  |
| Chr9:95,713,880-95,717,088                 | Pls1            | No                      | Yes                      | 6                         | 4                                  |
| Chr11:85,972,172-85,973,065                | Brip1           | No                      | Yes                      | 7                         | 4                                  |
| Chr14:9,163,756-9,164,848                  | Fam107a         | No                      | No                       | 9                         | 0                                  |
| Chr7:59,140,441-59,141,435                 | Gas2            | No                      | No                       | 8                         | 0                                  |

**Table 1. Results of *in vivo* mouse transgenic reporter assay for putative inner ear enhancers in the vicinity of Shh responsive genes.**

Figure 1

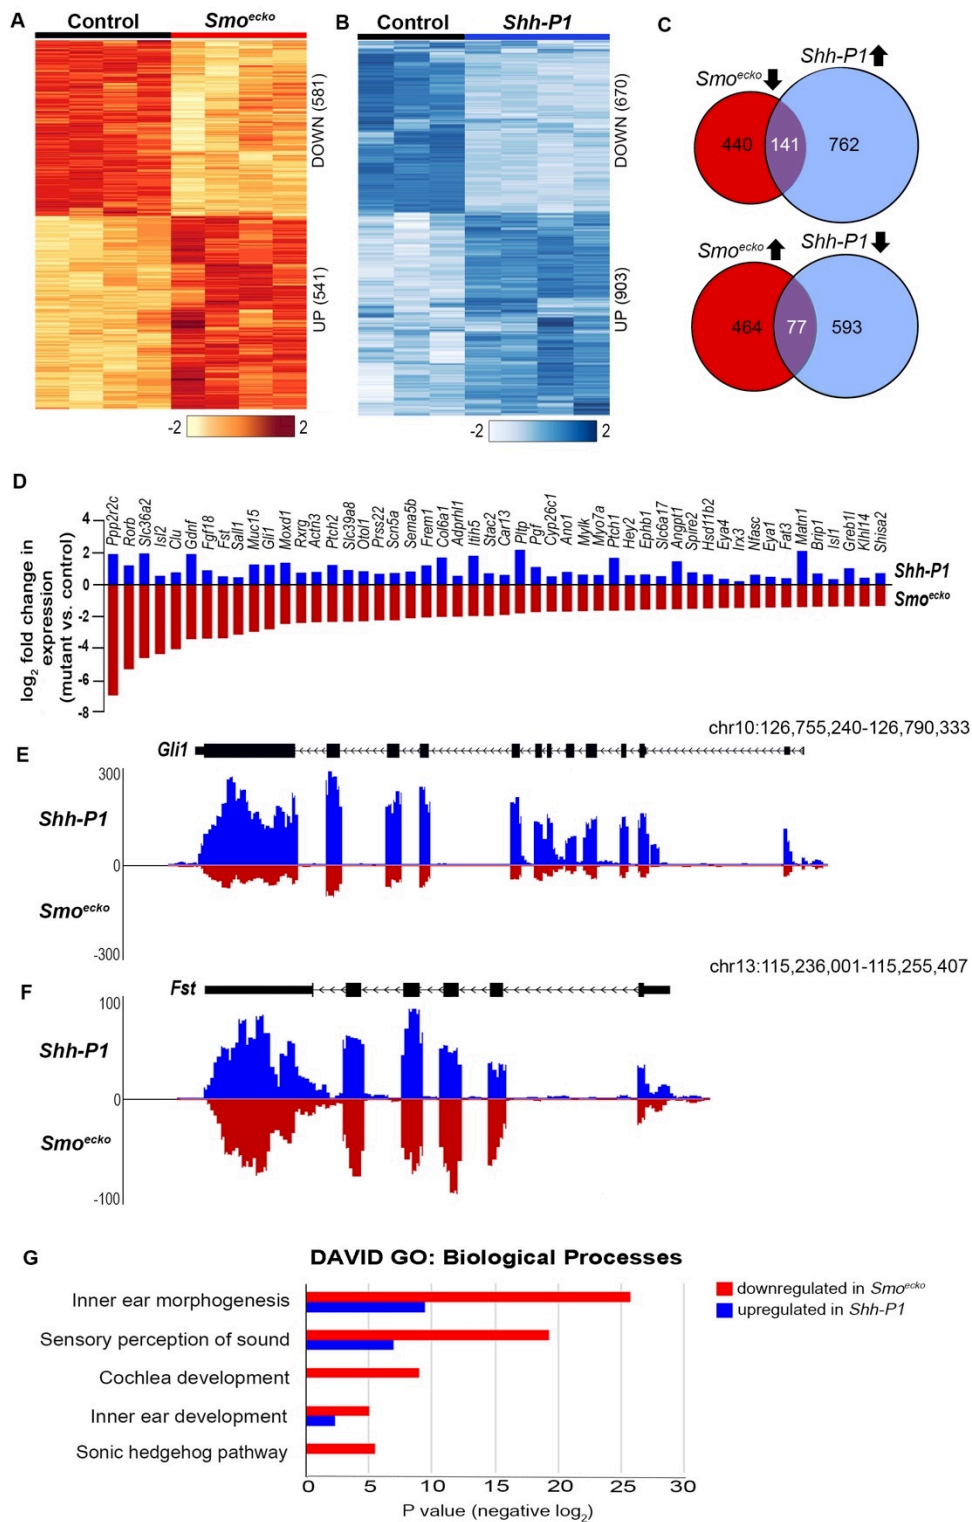

Figure 2

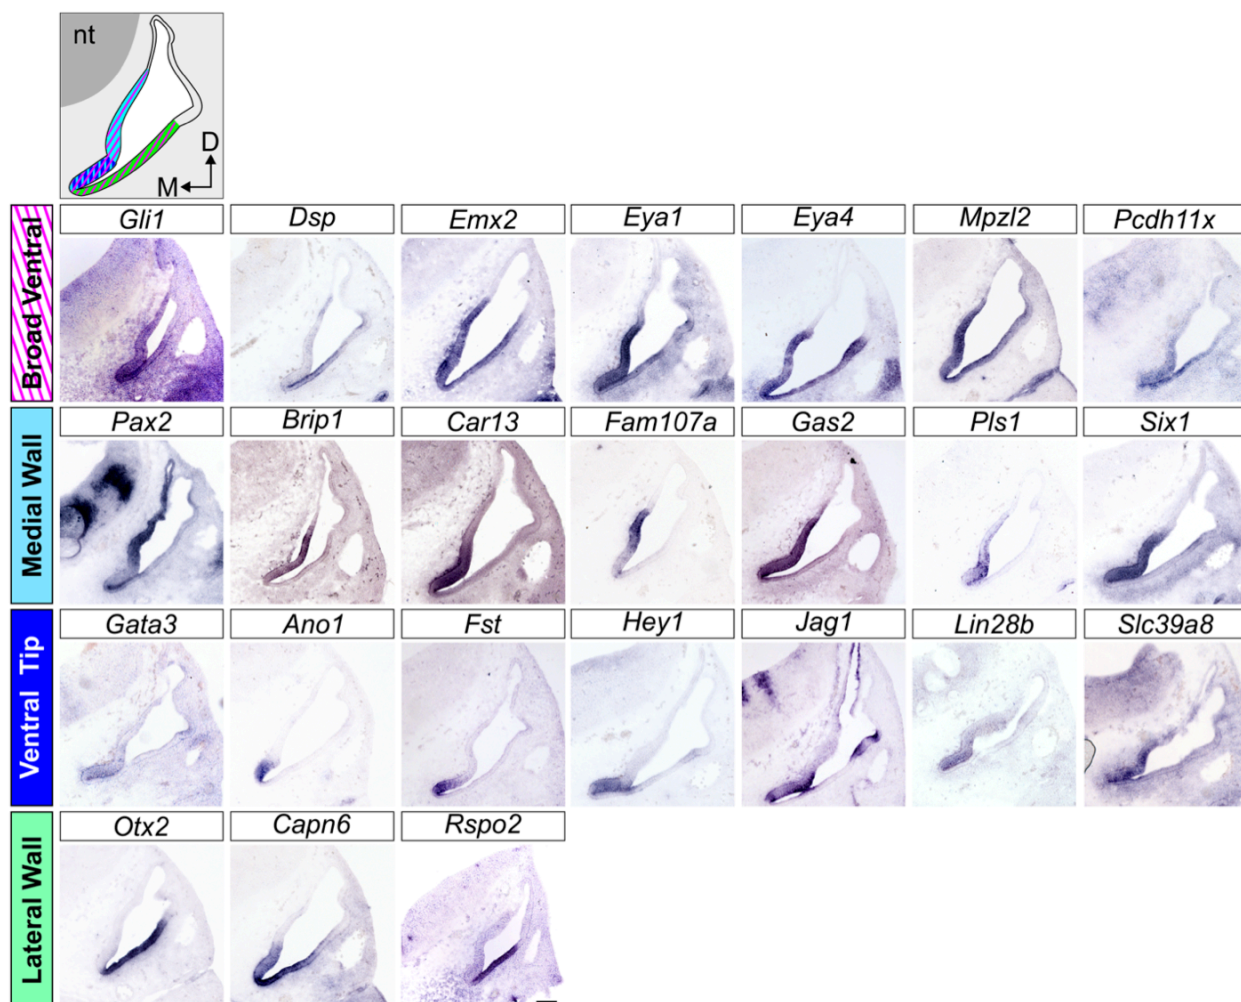



Figure 3

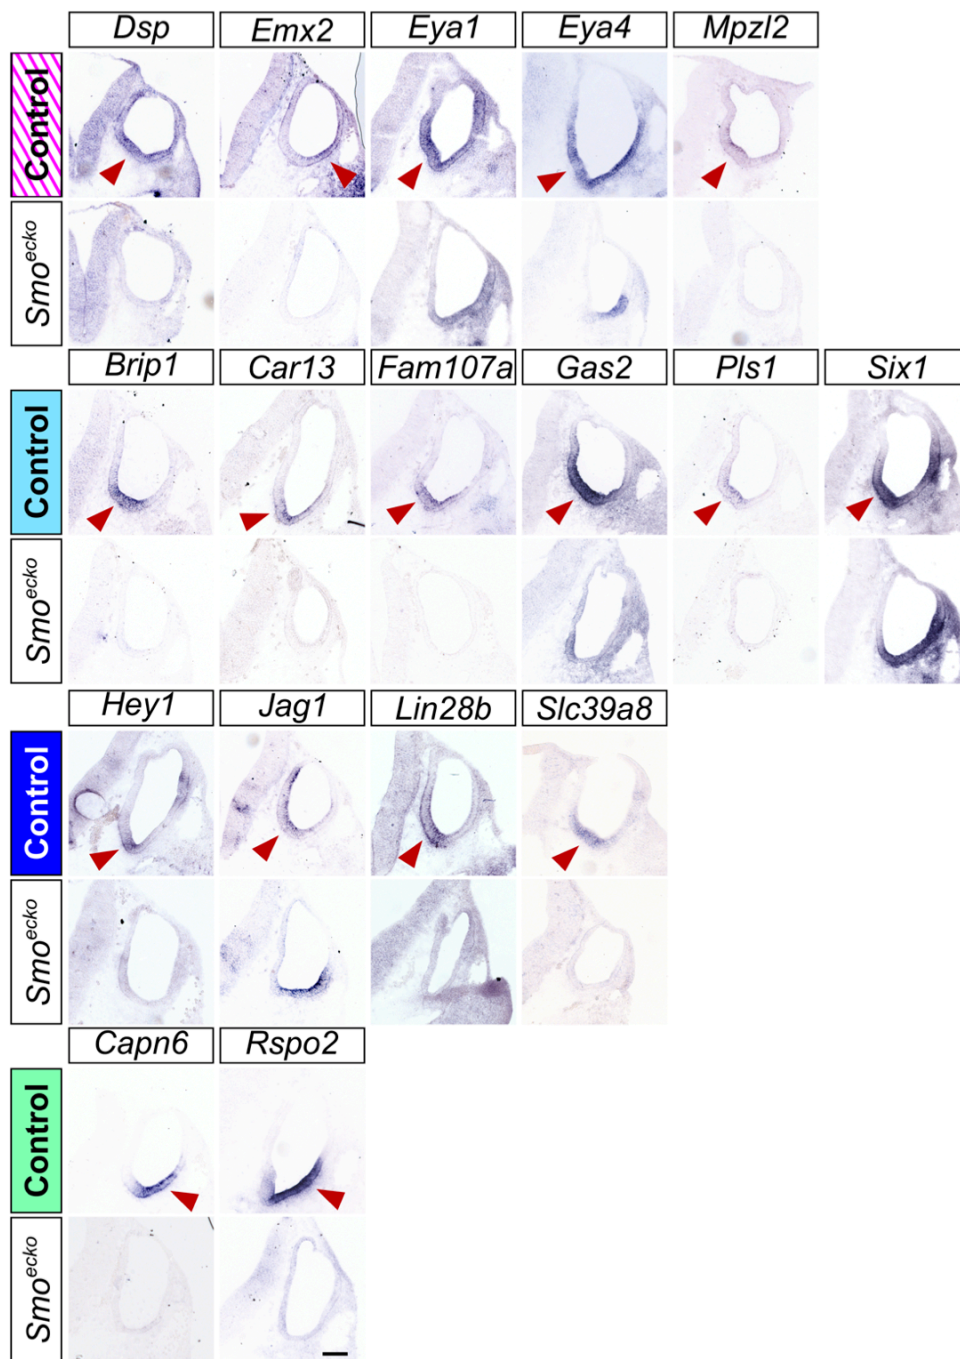

Figure 4

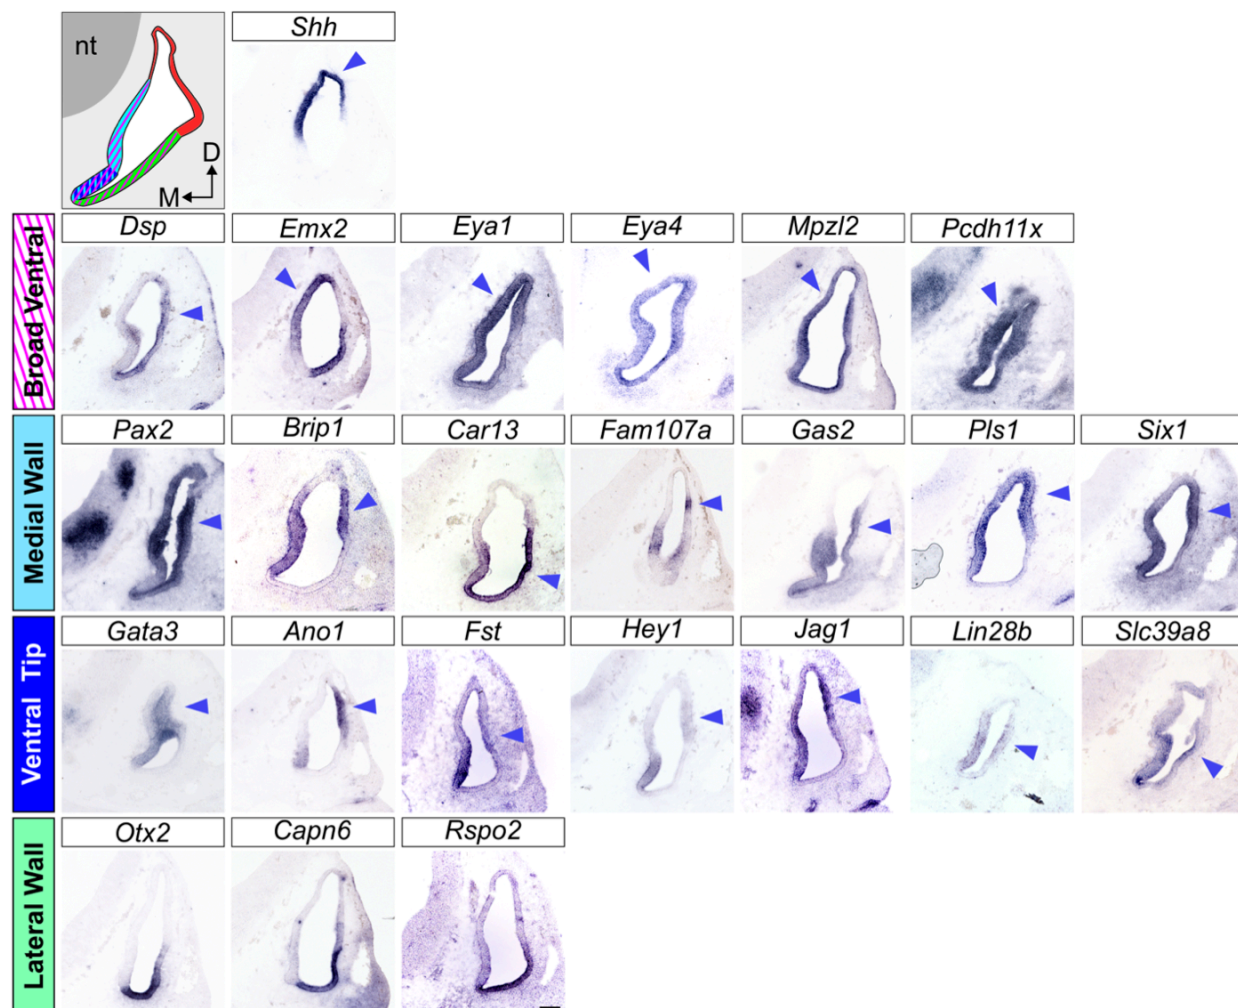

Figure 5

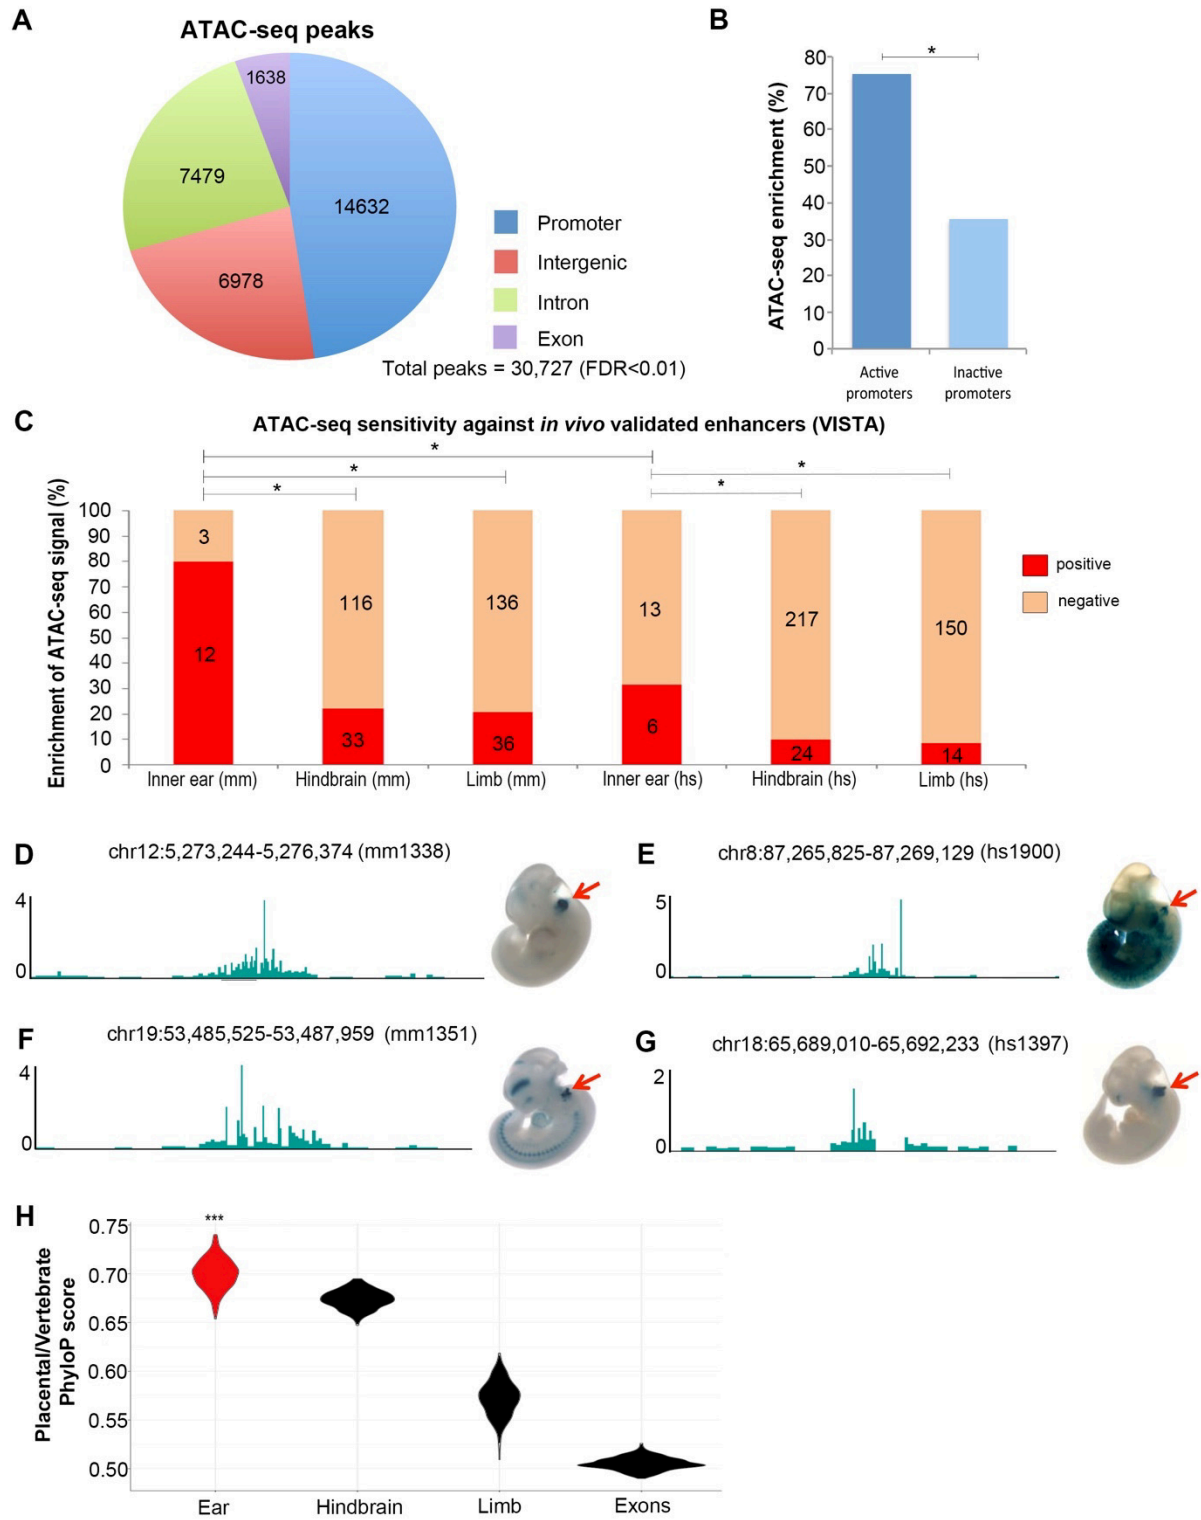

Figure 6

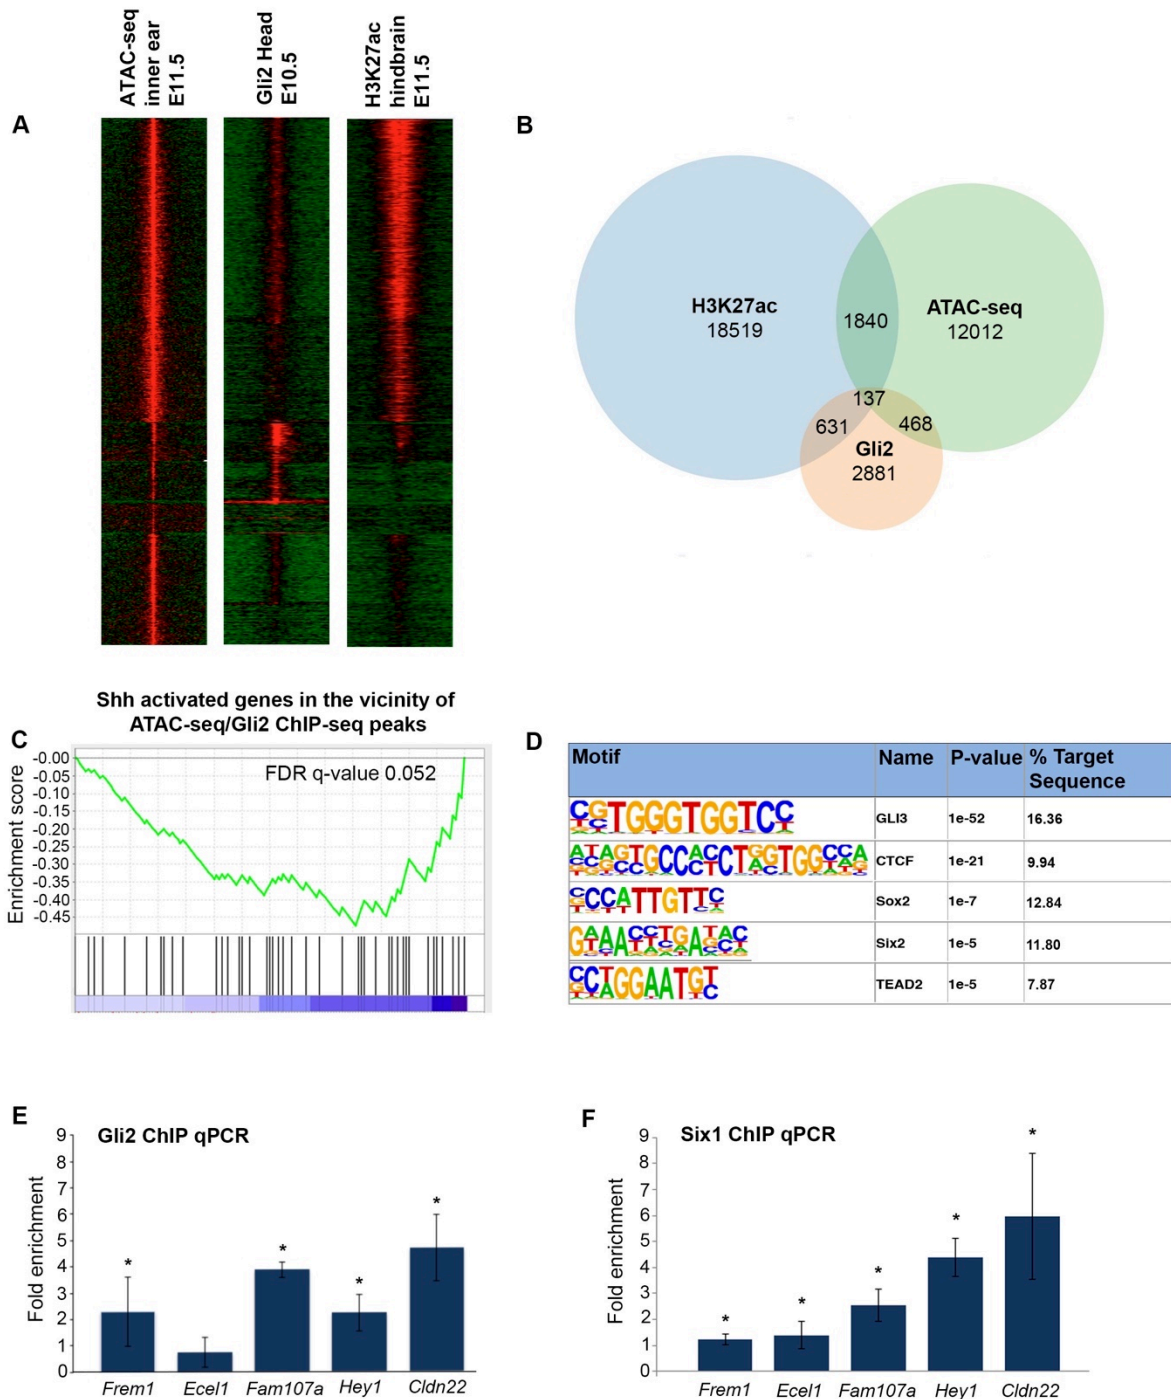

Figure 7

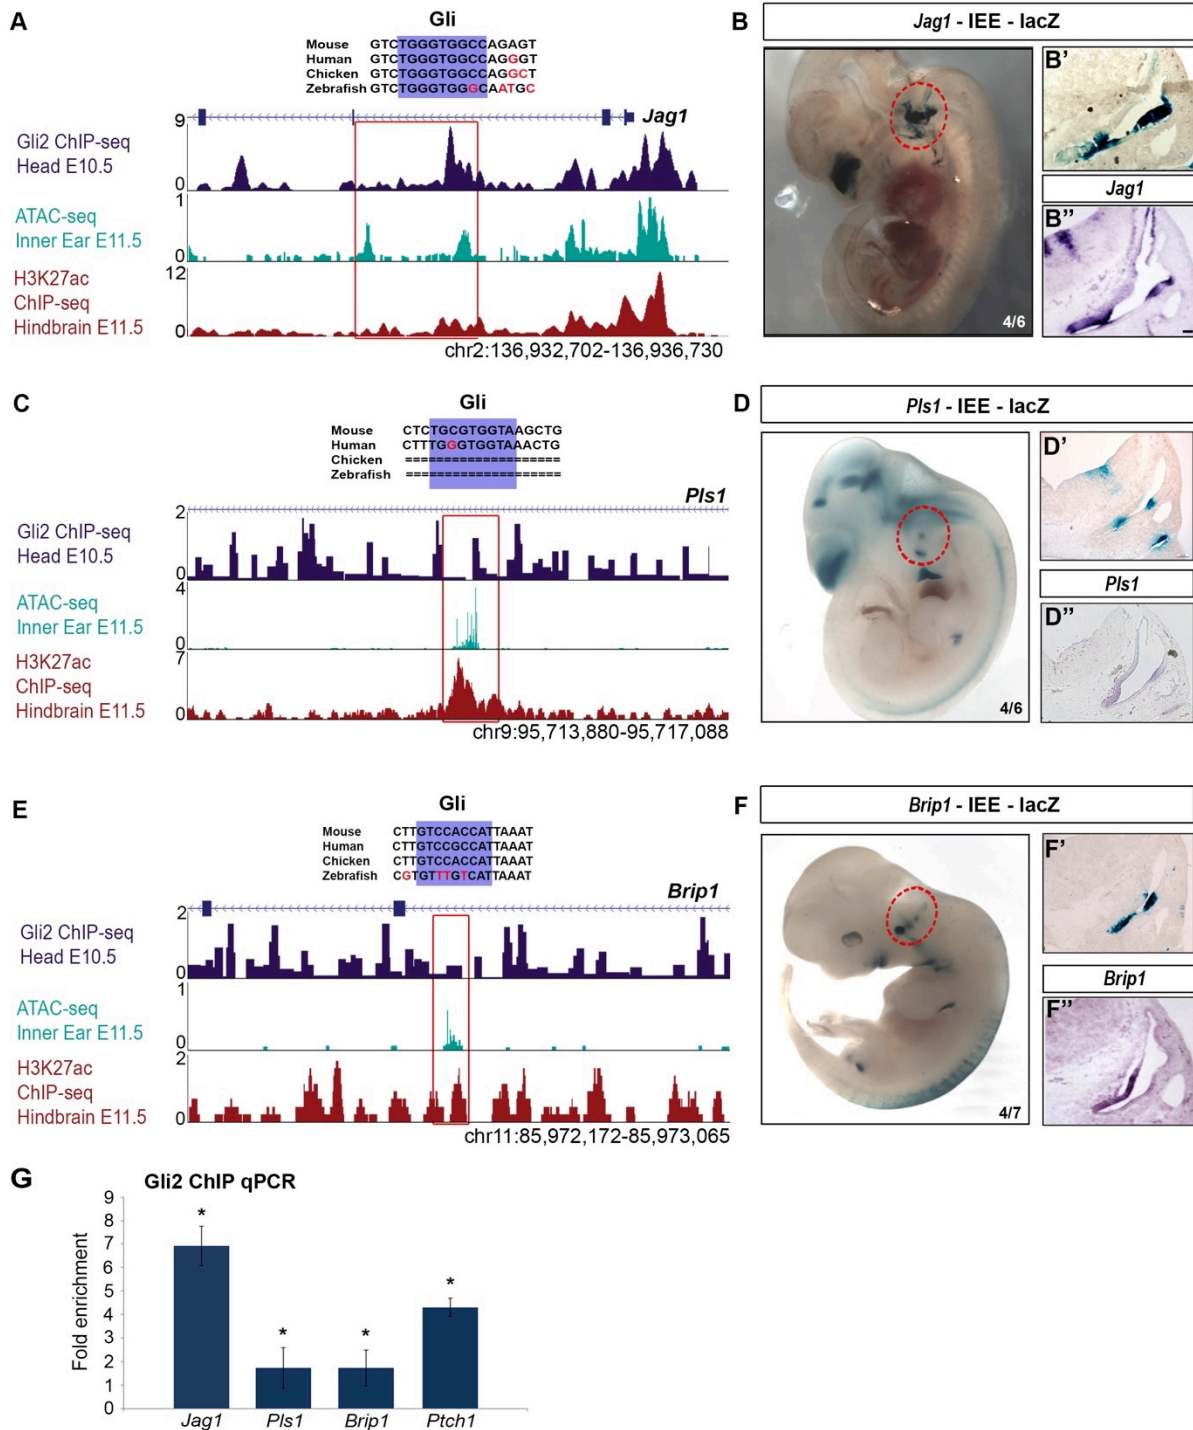

Source: https://biorxiv.org/content/biorxiv/early/2019/06/08/665091.full-text.pdf
